# Supplementary material for: Significance of TP53 mutation in bladder cancer disease progression and drug selection
Source: PeerJ. 2019 Dec 16;7:e8261. doi: 10.7717/peerj.8261 (PMC6921983; doi:10.7717/peerj.8261)
Supplement: Supplemental Information 1 [file peerj-07-8261-s001.xlsx]

## Sheet: Table s1
Table s1 Results of GSEA in TP53 mutated bladder cancer.
NAME	GS<br> follow link to MSigDB	GS DETAILS	SIZE	ES	NES	NOM p-val	FDR q-val	FWER p-val	RANK AT MAX	LEADING EDGE
HALLMARK_DNA_REPAIR	HALLMARK_DNA_REPAIR	Details ...	141	0.614269	2.65742	0	0	0	5018	tags=49%, list=14%, signal=56%
HALLMARK_G2M_CHECKPOINT	HALLMARK_G2M_CHECKPOINT	Details ...	194	0.781606	2.50981	0	0	0	6152	tags=81%, list=17%, signal=97%
HALLMARK_GLYCOLYSIS	HALLMARK_GLYCOLYSIS	Details ...	198	0.514145	2.36523	0	0	0	7641	tags=43%, list=21%, signal=55%
HALLMARK_PI3K_AKT_MTOR_SIGNALING	HALLMARK_PI3K_AKT_MTOR_SIGNALING	Details ...	104	0.460549	2.18559	0	0	0	11079	tags=56%, list=30%, signal=80%
HALLMARK_MYC_TARGETS_V1	HALLMARK_MYC_TARGETS_V1	Details ...	197	0.679483	2.16968	0	0	0	6531	tags=66%, list=18%, signal=80%
HALLMARK_SPERMATOGENESIS	HALLMARK_SPERMATOGENESIS	Details ...	133	0.542092	2.13972	0	0	0	11820	tags=61%, list=32%, signal=89%
HALLMARK_MTORC1_SIGNALING	HALLMARK_MTORC1_SIGNALING	Details ...	197	0.589461	1.96396	0	0	0	7188	tags=52%, list=20%, signal=64%
HALLMARK_HEME_METABOLISM	HALLMARK_HEME_METABOLISM	Details ...	194	0.372038	1.8976	0	0.0280612	0.1	6513	tags=29%, list=18%, signal=35%
HALLMARK_UV_RESPONSE_UP	HALLMARK_UV_RESPONSE_UP	Details ...	154	0.474964	1.8225	0	0.0249433	0.1	5352	tags=34%, list=15%, signal=39%
HALLMARK_CHOLESTEROL_HOMEOSTASIS	HALLMARK_CHOLESTEROL_HOMEOSTASIS	Details ...	73	0.494753	1.7842	0	0.022449	0.1	5891	tags=40%, list=16%, signal=47%
HALLMARK_PROTEIN_SECRETION	HALLMARK_PROTEIN_SECRETION	Details ...	95	0.523013	1.76976	0	0.0204082	0.1	10942	tags=60%, list=30%, signal=85%
HALLMARK_PEROXISOME	HALLMARK_PEROXISOME	Details ...	103	0.370539	1.65937	0	0.0620465	0.2	9251	tags=41%, list=25%, signal=54%
HALLMARK_E2F_TARGETS	HALLMARK_E2F_TARGETS	Details ...	196	0.80569	1.62737	0	0.0718625	0.3	4542	tags=82%, list=12%, signal=93%
HALLMARK_ANDROGEN_RESPONSE	HALLMARK_ANDROGEN_RESPONSE	Details ...	97	0.384219	1.60604	0	0.0802763	0.3	9183	tags=38%, list=25%, signal=51%
HALLMARK_REACTIVE_OXIGEN_SPECIES_PATHWAY	HALLMARK_REACTIVE_OXIGEN_SPECIES_PATHWAY	Details ...	46	0.374156	1.58864	0	0.101115	0.4	8536	tags=41%, list=23%, signal=54%
HALLMARK_MITOTIC_SPINDLE	HALLMARK_MITOTIC_SPINDLE	Details ...	197	0.608406	1.56385	0	0.101811	0.4	7745	tags=53%, list=21%, signal=67%
HALLMARK_ESTROGEN_RESPONSE_LATE	HALLMARK_ESTROGEN_RESPONSE_LATE	Details ...	198	0.345035	1.5182	0	0.126786	0.4	9203	tags=35%, list=25%, signal=46%
HALLMARK_ALLOGRAFT_REJECTION	HALLMARK_ALLOGRAFT_REJECTION	Details ...	199	0.406898	1.45385	0.25	0.156534	0.4	10409	tags=44%, list=28%, signal=61%
HALLMARK_HYPOXIA	HALLMARK_HYPOXIA	Details ...	194	0.329828	1.43685	0	0.148295	0.4	11379	tags=39%, list=31%, signal=56%
HALLMARK_WNT_BETA_CATENIN_SIGNALING	HALLMARK_WNT_BETA_CATENIN_SIGNALING	Details ...	42	0.344194	1.37666	0.25	0.183475	0.4	6799	tags=26%, list=18%, signal=32%
HALLMARK_IL2_STAT5_SIGNALING	HALLMARK_IL2_STAT5_SIGNALING		195	0.332114	1.33165	0	0.1925	0.4	7659	tags=30%, list=21%, signal=37%
HALLMARK_TGF_BETA_SIGNALING	HALLMARK_TGF_BETA_SIGNALING		54	0.302077	1.32906	0.25	0.18375	0.4	8484	tags=33%, list=23%, signal=43%
HALLMARK_NOTCH_SIGNALING	HALLMARK_NOTCH_SIGNALING		32	0.378695	1.32241	0	0.180641	0.4	11282	tags=44%, list=31%, signal=63%
HALLMARK_OXIDATIVE_PHOSPHORYLATION	HALLMARK_OXIDATIVE_PHOSPHORYLATION		183	0.373591	1.30797	0.333333	0.173114	0.4	11031	tags=45%, list=30%, signal=64%
HALLMARK_UNFOLDED_PROTEIN_RESPONSE	HALLMARK_UNFOLDED_PROTEIN_RESPONSE		109	0.619261	1.3078	0	0.16619	0.4	4776	tags=48%, list=13%, signal=55%
HALLMARK_MYC_TARGETS_V2	HALLMARK_MYC_TARGETS_V2		58	0.697884	1.25798	0	0.223655	0.6	8290	tags=78%, list=23%, signal=100%
HALLMARK_XENOBIOTIC_METABOLISM	HALLMARK_XENOBIOTIC_METABOLISM		198	0.263081	1.25396	0	0.215371	0.6	8009	tags=26%, list=22%, signal=33%
HALLMARK_APICAL_JUNCTION	HALLMARK_APICAL_JUNCTION		194	0.295114	1.25014	0.2	0.214453	0.6	11369	tags=39%, list=31%, signal=56%
HALLMARK_COMPLEMENT	HALLMARK_COMPLEMENT		195	0.329472	1.24533	0.333333	0.207058	0.6	13251	tags=47%, list=36%, signal=73%
HALLMARK_INTERFERON_GAMMA_RESPONSE	HALLMARK_INTERFERON_GAMMA_RESPONSE		197	0.492268	1.14694	0.333333	0.303376	0.7	11312	tags=57%, list=31%, signal=82%
HALLMARK_ESTROGEN_RESPONSE_EARLY	HALLMARK_ESTROGEN_RESPONSE_EARLY		197	0.282545	1.14388	0.333333	0.293589	0.7	8303	tags=29%, list=23%, signal=38%
HALLMARK_INTERFERON_ALPHA_RESPONSE	HALLMARK_INTERFERON_ALPHA_RESPONSE		93	0.563678	1.12833	0.333333	0.294938	0.7	10929	tags=68%, list=30%, signal=96%
HALLMARK_PANCREAS_BETA_CELLS	HALLMARK_PANCREAS_BETA_CELLS		40	0.516618	1.12828	0.333333	0.286	0.7	12207	tags=63%, list=33%, signal=93%
HALLMARK_FATTY_ACID_METABOLISM	HALLMARK_FATTY_ACID_METABOLISM		157	0.368564	1.08878	0.5	0.312081	0.7	11757	tags=45%, list=32%, signal=66%
HALLMARK_INFLAMMATORY_RESPONSE	HALLMARK_INFLAMMATORY_RESPONSE		197	0.352036	1.06809	0.333333	0.326221	0.7	10585	tags=39%, list=29%, signal=54%
HALLMARK_UV_RESPONSE_DN	HALLMARK_UV_RESPONSE_DN		140	0.266063	1.03972	0.4	0.371678	0.8	9738	tags=31%, list=26%, signal=43%
HALLMARK_APICAL_SURFACE	HALLMARK_APICAL_SURFACE		43	0.242567	0.982277	0.333333	0.491877	0.8	6406	tags=21%, list=17%, signal=25%
HALLMARK_KRAS_SIGNALING_DN	HALLMARK_KRAS_SIGNALING_DN		190	0.234296	0.967788	0.571429	0.50521	0.8	10941	tags=34%, list=30%, signal=48%
HALLMARK_ADIPOGENESIS	HALLMARK_ADIPOGENESIS		190	0.278993	0.96521	0.333333	0.496957	0.8	11443	tags=35%, list=31%, signal=51%
HALLMARK_IL6_JAK_STAT3_SIGNALING	HALLMARK_IL6_JAK_STAT3_SIGNALING		87	0.323922	0.951438	0.333333	0.495664	0.8	9744	tags=38%, list=26%, signal=51%
HALLMARK_APOPTOSIS	HALLMARK_APOPTOSIS		159	0.294351	0.943454	0.5	0.502464	0.8	9837	tags=32%, list=27%, signal=44%
HALLMARK_BILE_ACID_METABOLISM	HALLMARK_BILE_ACID_METABOLISM		112	0.262824	0.900559	0.5	0.566172	0.8	8987	tags=29%, list=24%, signal=39%
HALLMARK_HEDGEHOG_SIGNALING	HALLMARK_HEDGEHOG_SIGNALING		35	0.274062	0.899478	0.571429	0.553005	0.8	9810	tags=31%, list=27%, signal=43%
HALLMARK_TNFA_SIGNALING_VIA_NFKB	HALLMARK_TNFA_SIGNALING_VIA_NFKB		198	0.246018	0.692418	0.5	0.809252	0.8	9386	tags=28%, list=26%, signal=38%
